# Supplementary material for: Near-to-eutectic mixtures as bifunctional catalysts in the low-temperature-ring-opening-polymerization of ε-caprolactone
Source: Royal Society of Chemistry journal article supplement (doi:10.1039/c5gc00348b), 2015-01-01

Supplementary Information of the Manuscript entitled

## Eutectic Mixtures as Bifunctional Catalysts in the Low-Temperature-Synthesis of Polycaprolactone

by Sara García-Argüelles et al.

**Figure S1:**  $^1\text{H}$  NMR spectra of the components that form the DESs (e.g. TBD and  $\text{MeSO}_3\text{H}$ ) and of the TBD: $\text{MeSO}_3\text{H}$  mixtures with 0.1:1.5 and 0.5:1.5 molar ratios.

### $\text{MeSO}_3\text{H}$ ( $\text{CDCl}_3$ )

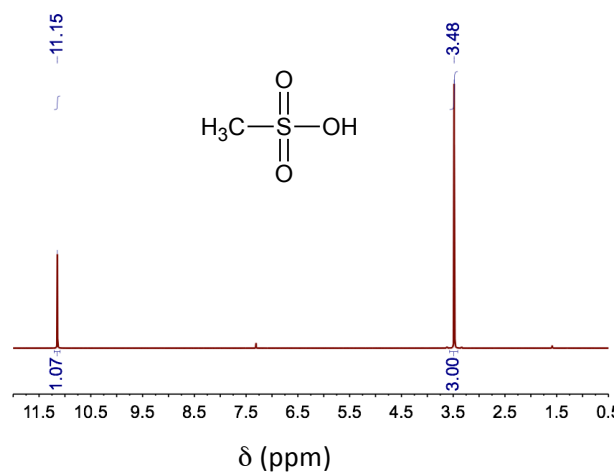

### TBD ( $\text{CDCl}_3$ )

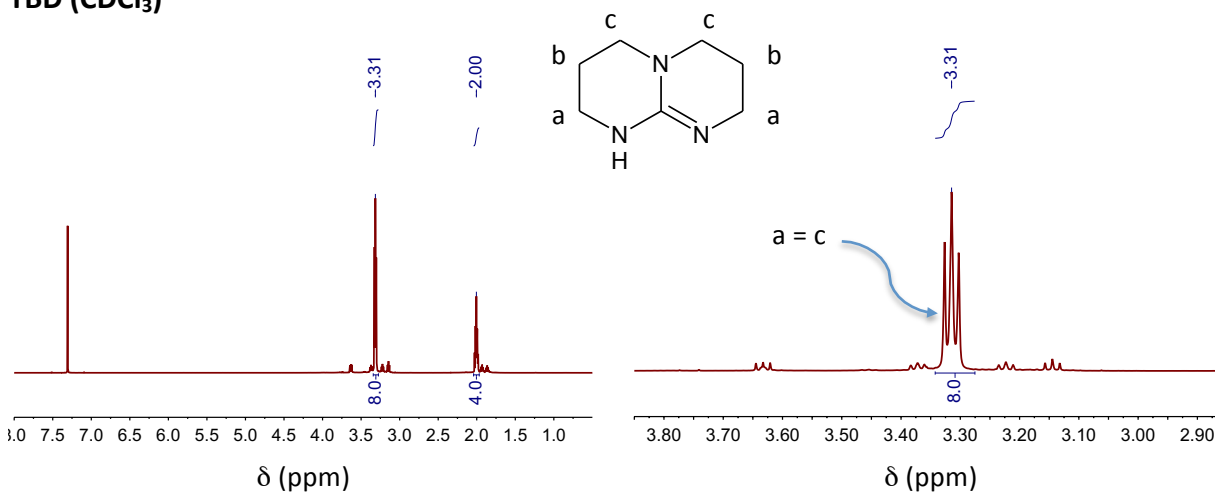

### DES 0.1:1.5

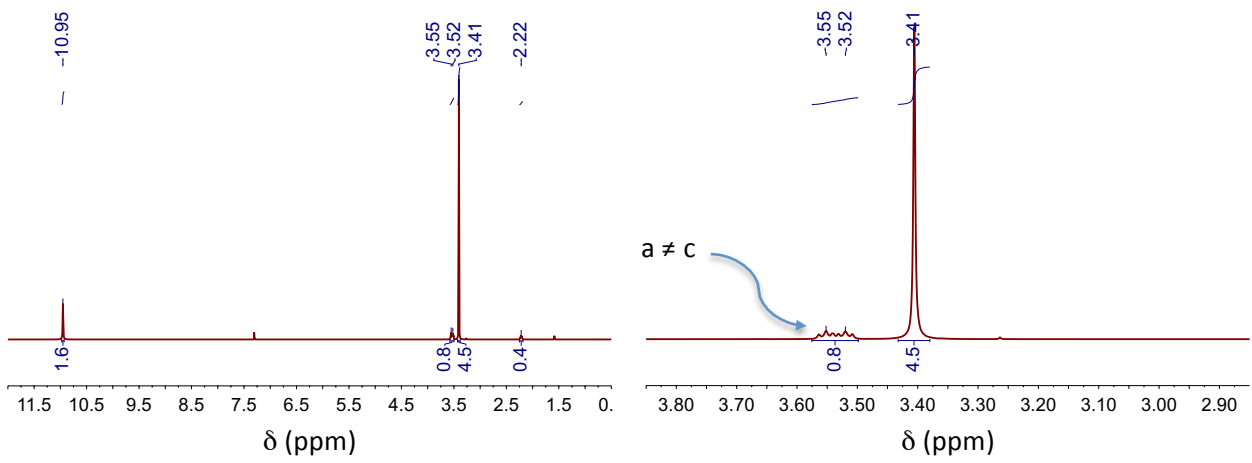

### DES 0.5:1.5

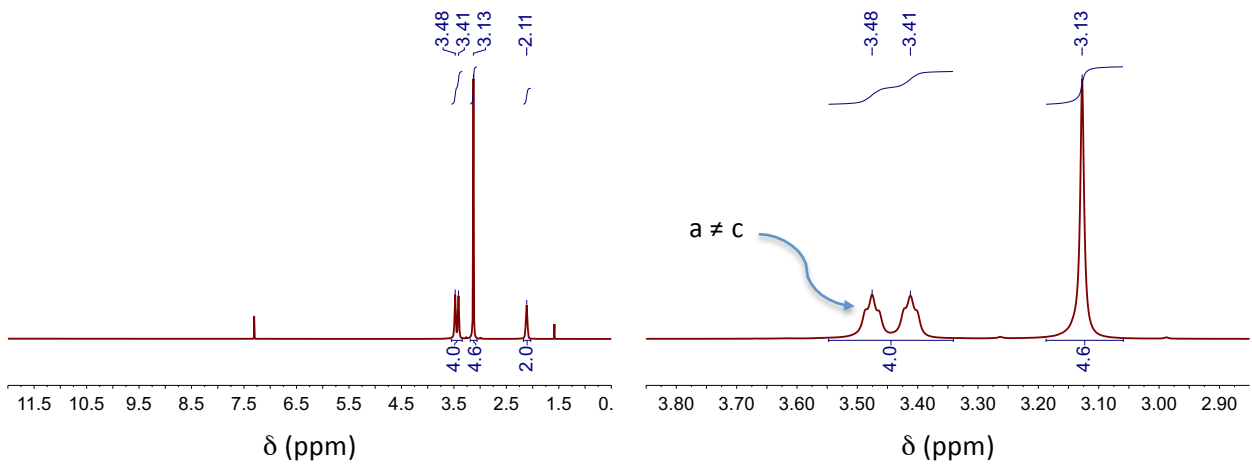

**Figure S2:** DSC scan of the eutectic TBD:MeSO<sub>3</sub>H mixture with a molar ratio of 0.05:1.5.

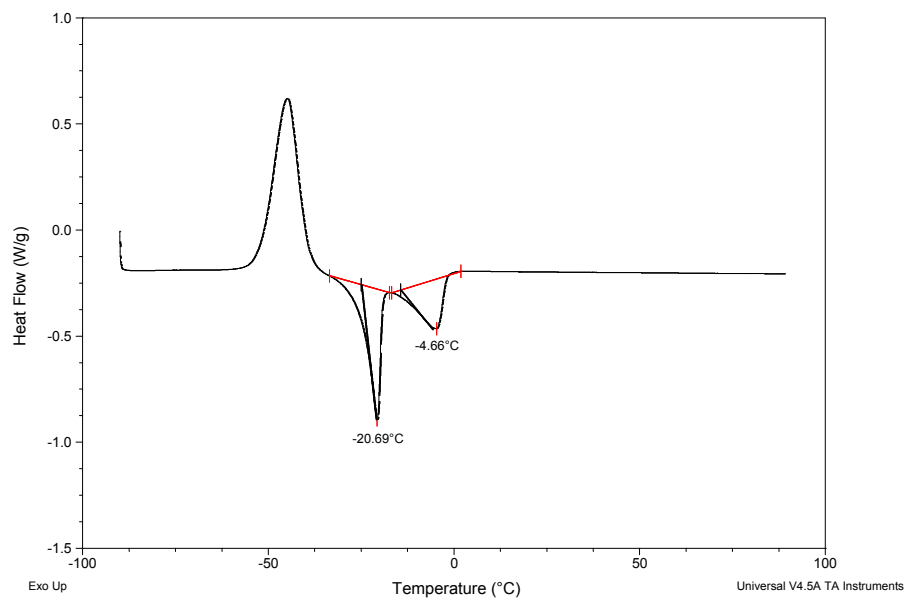

**Figure S3:** GPC separation of the PCLs obtained in this work with initiator (a) and without initiator (b).

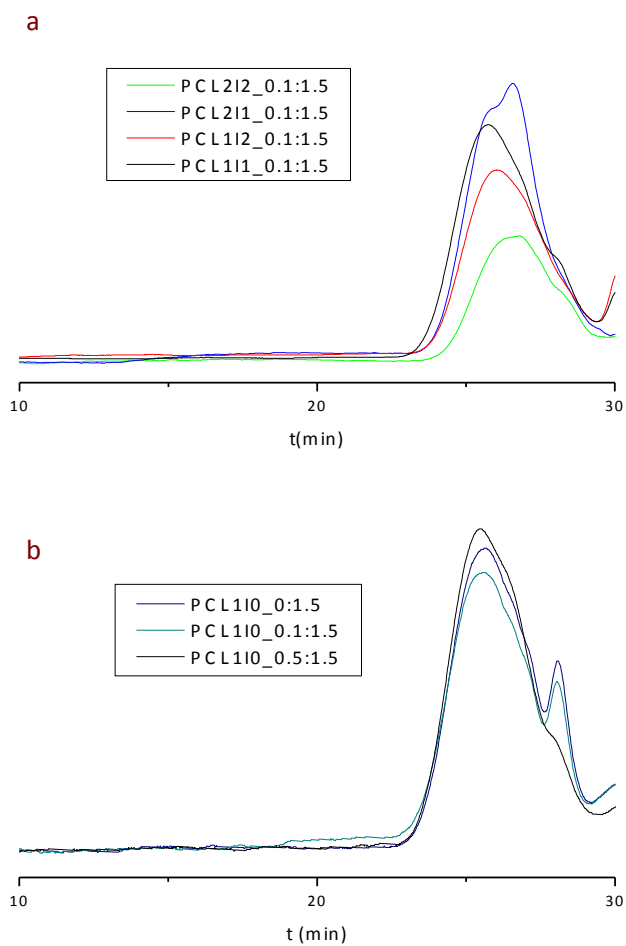

**Table S1:**  $^1\text{H}$  NMR chemical shifts ( $\delta$ , in ppm) of different PCLs obtained with initiator.

| Set 1          | e-caprolactone                     | Polycaprolactone                          |                                         |                                                                |                                           |                                                           |                                                       | Initiator                                   |                                             |
|----------------|------------------------------------|-------------------------------------------|-----------------------------------------|----------------------------------------------------------------|-------------------------------------------|-----------------------------------------------------------|-------------------------------------------------------|---------------------------------------------|---------------------------------------------|
|                | $-\text{CO}-\text{O}-\text{CH}_2-$ | $-\text{CO}-\text{O}-\text{CH}_2-$<br>(f) | $\text{H}-\text{O}-\text{CH}_2-$<br>(q) | $\text{Ph}-\text{CH}_2-\text{O}-\text{CO}-\text{CH}_2-$<br>(b) | $-\text{O}-\text{CO}-\text{CH}_2-$<br>(h) | $-\text{CH}_2-\text{CH}_2-\text{CH}_2-\text{O}-$<br>(d,e) | $-\text{O}-\text{CO}-\text{CH}_2-\text{CH}_2-$<br>(l) | $\text{Ph}-\text{CH}_2-\text{O}-\text{CO}-$ | $\text{Ph}-\text{CH}_2-\text{O}-\text{CO}-$ |
| PCL1I1_0.1:1.5 | 4.25                               | 4.09                                      | 3.68                                    | 2.39                                                           | 2.34                                      | 1.68                                                      | 1.42                                                  | 7.38                                        | 5.15                                        |
| PCL1I2_0.1:1.5 | 4.26                               | 4.10                                      | 3.69                                    | 2.40                                                           | 2.34                                      | 1.69                                                      | 1.42                                                  | 7.39                                        | 5.15                                        |
| PCL2I1_0.1:1.5 | 4.24                               | 4.09                                      | 3.68                                    | 2.39                                                           | 2.34                                      | 1.69                                                      | 1.42                                                  | 7.38                                        | 5.15                                        |
| PCL2I2_0.1:1.5 | 4.26                               | 4.10                                      | 3.69                                    | 2.40                                                           | 2.34                                      | 1.69                                                      | 1.42                                                  | 7.39                                        | 5.15                                        |

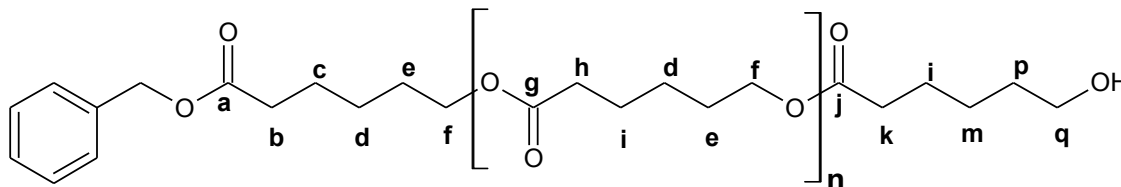

**Table S2:**  $^1\text{H}$  NMR chemical shifts ( $\delta$ , in ppm) of different PCLs obtained without initiator.

| Set 2          | e-caprolactone                     | Polycaprolactone                          |                                         |                                                   |                                           |                                                           |                                                       |
|----------------|------------------------------------|-------------------------------------------|-----------------------------------------|---------------------------------------------------|-------------------------------------------|-----------------------------------------------------------|-------------------------------------------------------|
|                | $-\text{CO}-\text{O}-\text{CH}_2-$ | $-\text{CO}-\text{O}-\text{CH}_2-$<br>(f) | $\text{H}-\text{O}-\text{CH}_2-$<br>(q) | $\text{H}-\text{O}-\text{CO}-\text{CH}_2-$<br>(b) | $-\text{O}-\text{CO}-\text{CH}_2-$<br>(h) | $-\text{CH}_2-\text{CH}_2-\text{CH}_2-\text{O}-$<br>(d,e) | $-\text{O}-\text{CO}-\text{CH}_2-\text{CH}_2-$<br>(l) |
| PCL1I0_0.1:1.5 | 4.26                               | 4.10                                      | 3.69                                    | 2.40                                              | 2.36                                      | 1.69                                                      | 1.42                                                  |
| PCL1I0_0.5:1.5 | 4.24                               | 4.10                                      | 3.69                                    | 2.40                                              | 2.34                                      | 1.69                                                      | 1.42                                                  |
| PCL1I0_0:1.5   | 4.26                               | 4.10                                      | 3.69                                    | 2.40                                              | 2.34                                      | 1.69                                                      | 1.42                                                  |

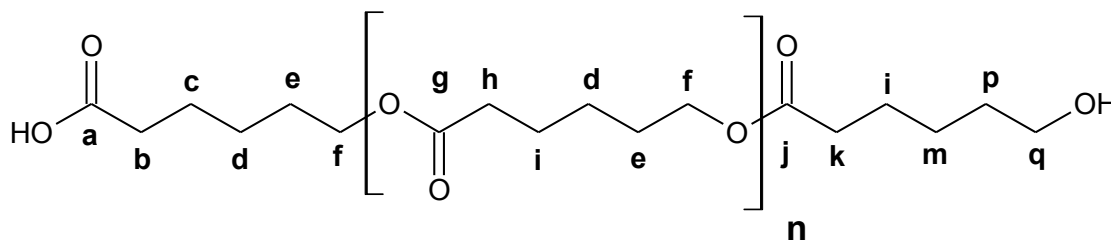

**Figure S4:** Details of the  $^1\text{H}$  NMR spectra of different PCLs obtained with initiator depicted in Figure S2 for better visualization of peaks ascribed to terminal methylene groups; (a) at ca. 3.7 ppm for those bonded to hydroxyl groups and (b) at ca. 2.4 ppm for those bonded to carboxylic groups.

**PCL111\_0.1:1.5**

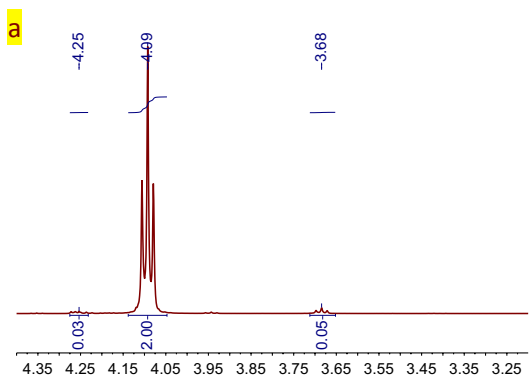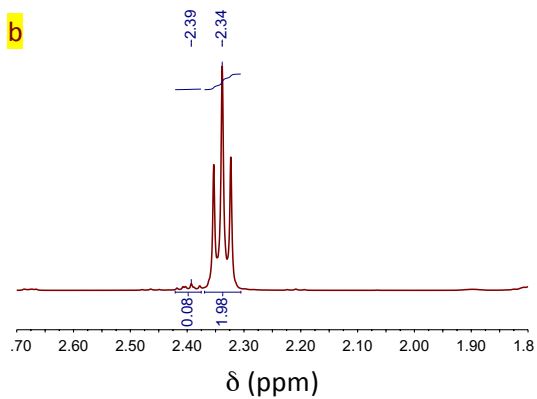

**PCL112\_0.1:1.5**

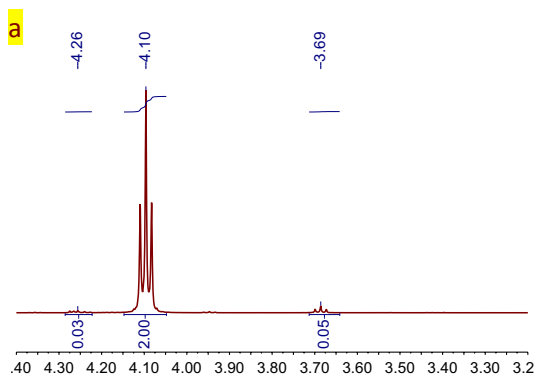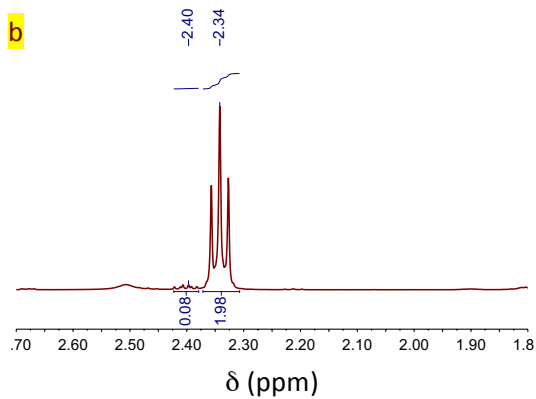

**PCL211\_0.1:1.5**

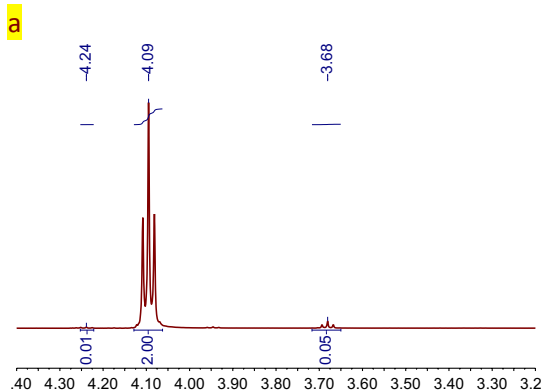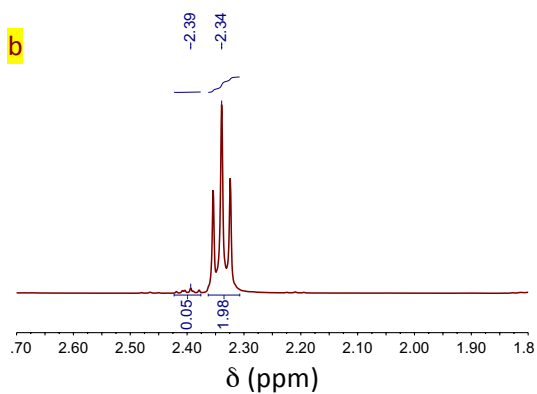

**PCL212\_0.1:1.5**

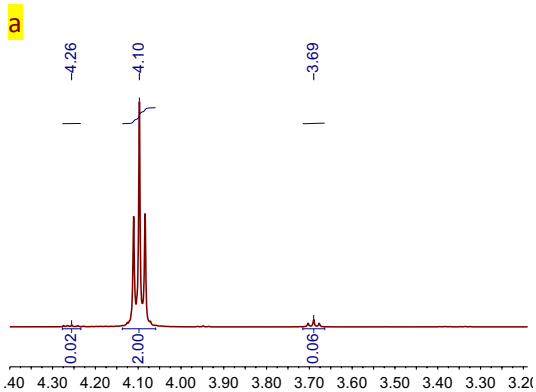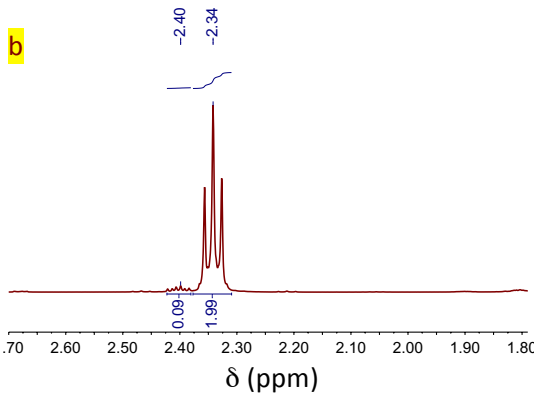

**Figure S5:** Details of the  $^1\text{H}$  NMR spectra of different PCLs obtained with initiator depicted in Figure S2 for chemical shifts ranging from (a) 3.20 to 4.40 ppm and (b) from 2.0 to 2.75 ppm.

**PCL110\_0.1:1.5**

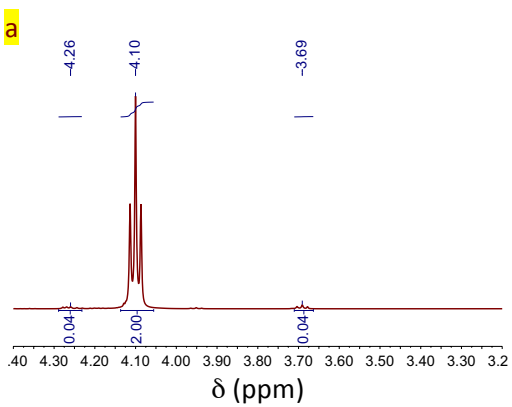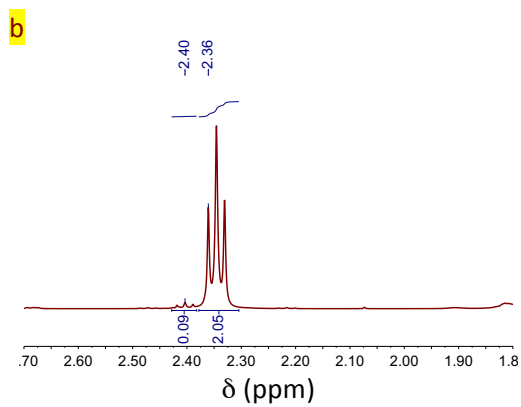

**PCL110\_0.5:1.5**

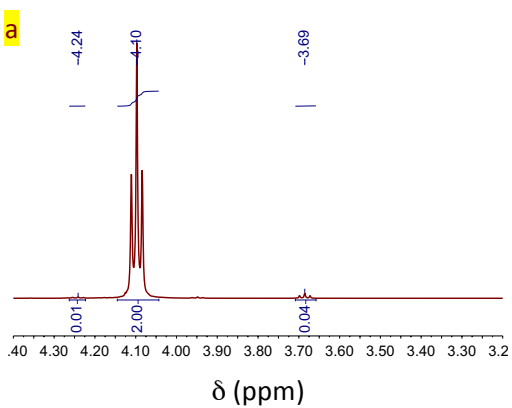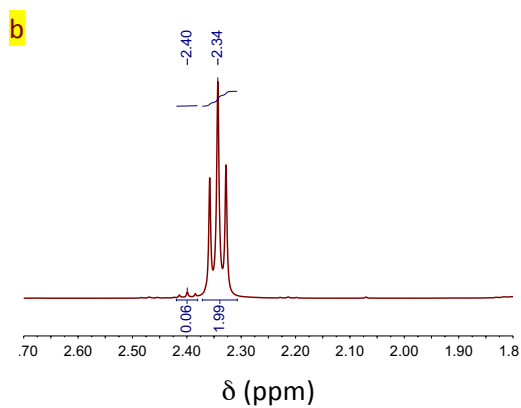

**PCL110\_0:1.5**

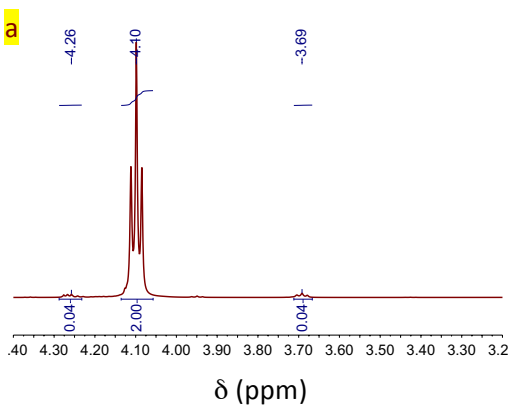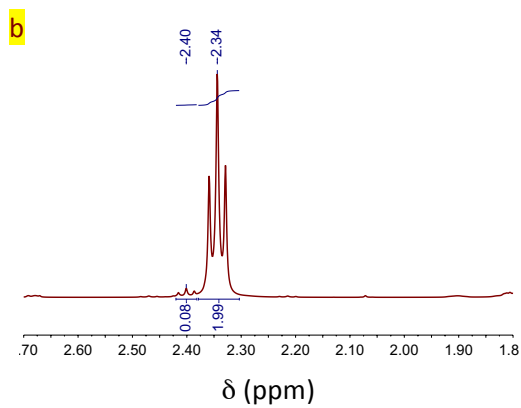

Figure S6: DSC scans – 1<sup>st</sup> and 2<sup>nd</sup> runs – of PCLs synthesized as described in Table 1.

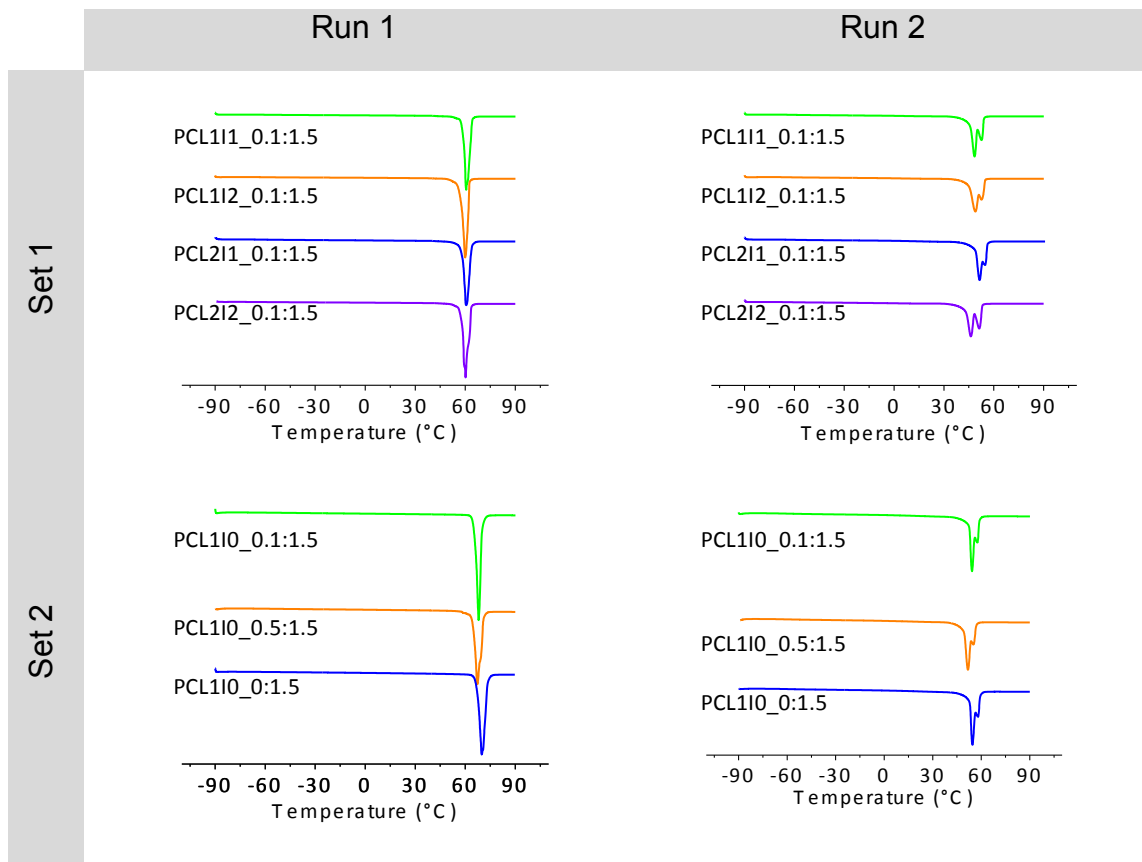



**Figure S7:** XRD of PCLs synthesized as described in Table 1.

**a) Set 1**

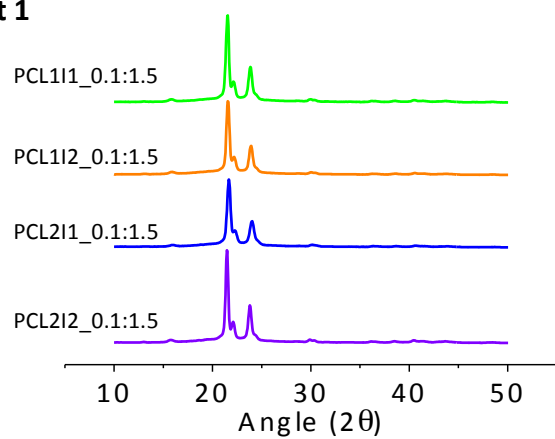

**b) Set 2**

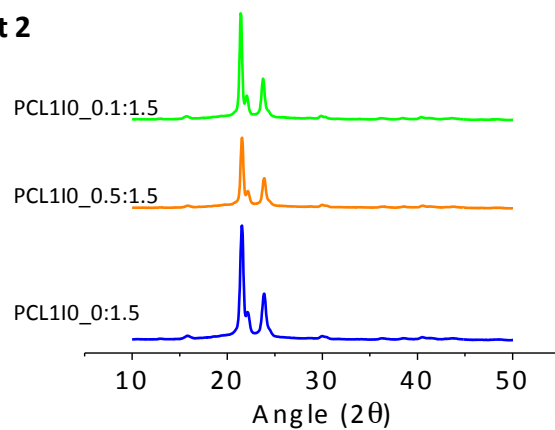

Supplement: c5gc00348b1.pdf [file c5gc00348b1.pdf]
